# Supplementary material for: Differential Effects of Endothelial Cell- as opposed to Neutrophil-Lineage Restricted PD-L1 Gene Expression on Experimental Murine Shock/ Sepsis-Induced Lung Injury
Source: Research Square preprint supplement (doi:10.21203/rs.3.rs-7687015/v1), 2025-10-07

**Supplemental Figure 5. C57BL/6 strain vs. Cre-Lox mouse construction ‘Controls’ 14-day overall survival following exposure to the sequential insults of experimental shock/ sepsis were not statistically distinct.** Control or C57BL/6 mouse 14-day overall survival after subjecting them to the sequential insults of Hem/CLP as depicted by Kaplan-Meier curves. The n/treatment group is listed in parentheses; these groups were not significantly different as determined by a Log-Rank test.

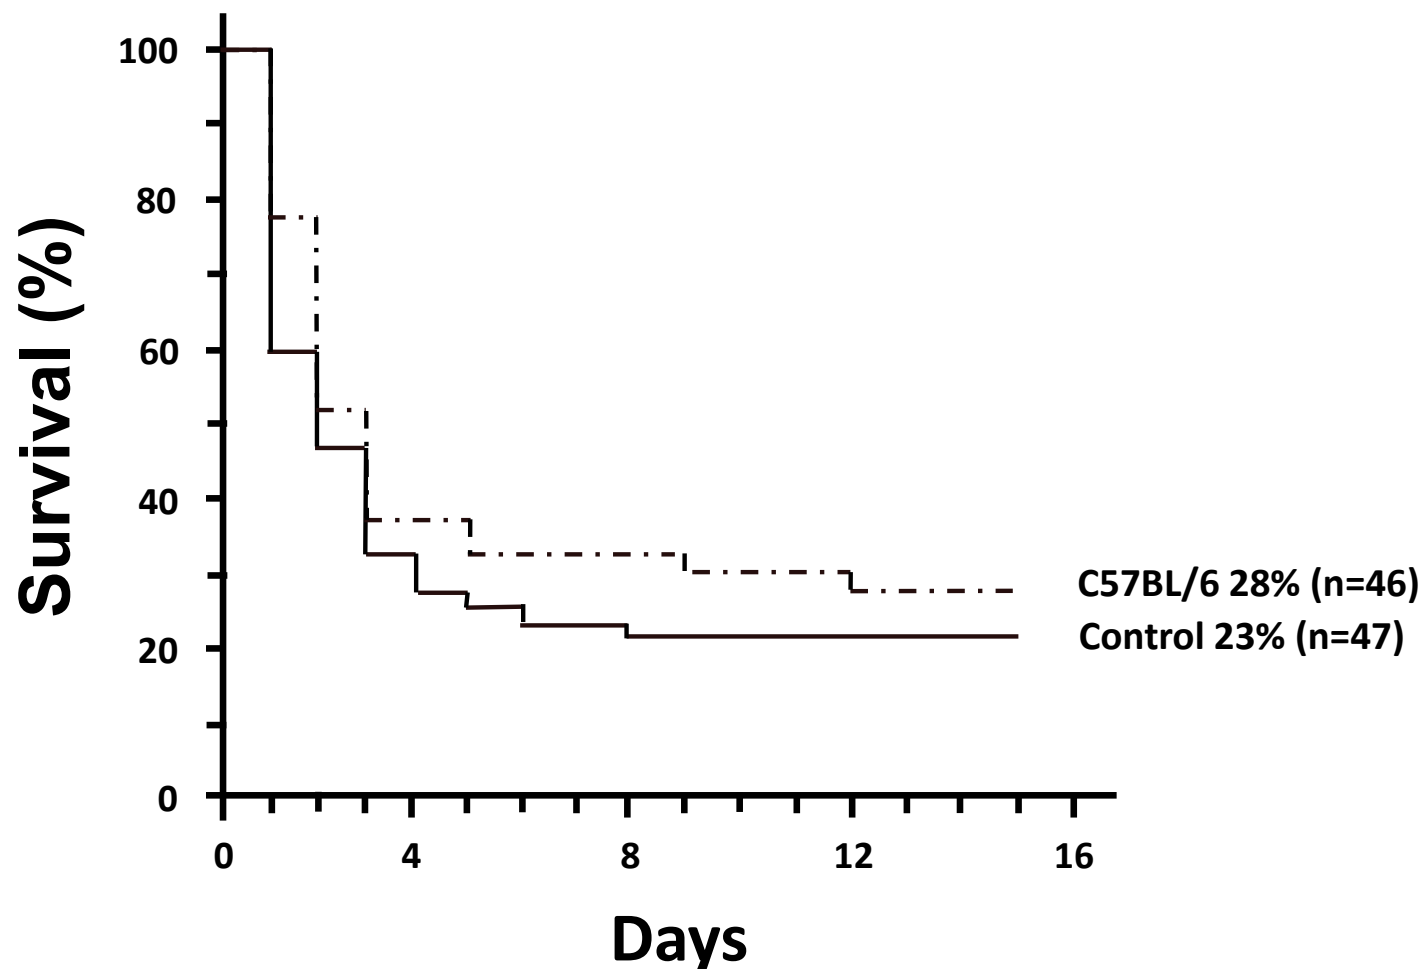

Supplement: Supplementary file 1 [file 014dd2beb401ecd8f5a1bbf9.pdf]
