# Supplementary material for: Differential Effects of Endothelial Cell- as opposed to Neutrophil-Lineage Restricted PD-L1 Gene Expression on Experimental Murine Shock/ Sepsis-Induced Lung Injury
Source: Research Square preprint supplement (doi:10.21203/rs.3.rs-7687015/v1), 2025-10-07
Supplement: Supplementary file 2 [file 8206656d0031f526e49497a3.pdf]

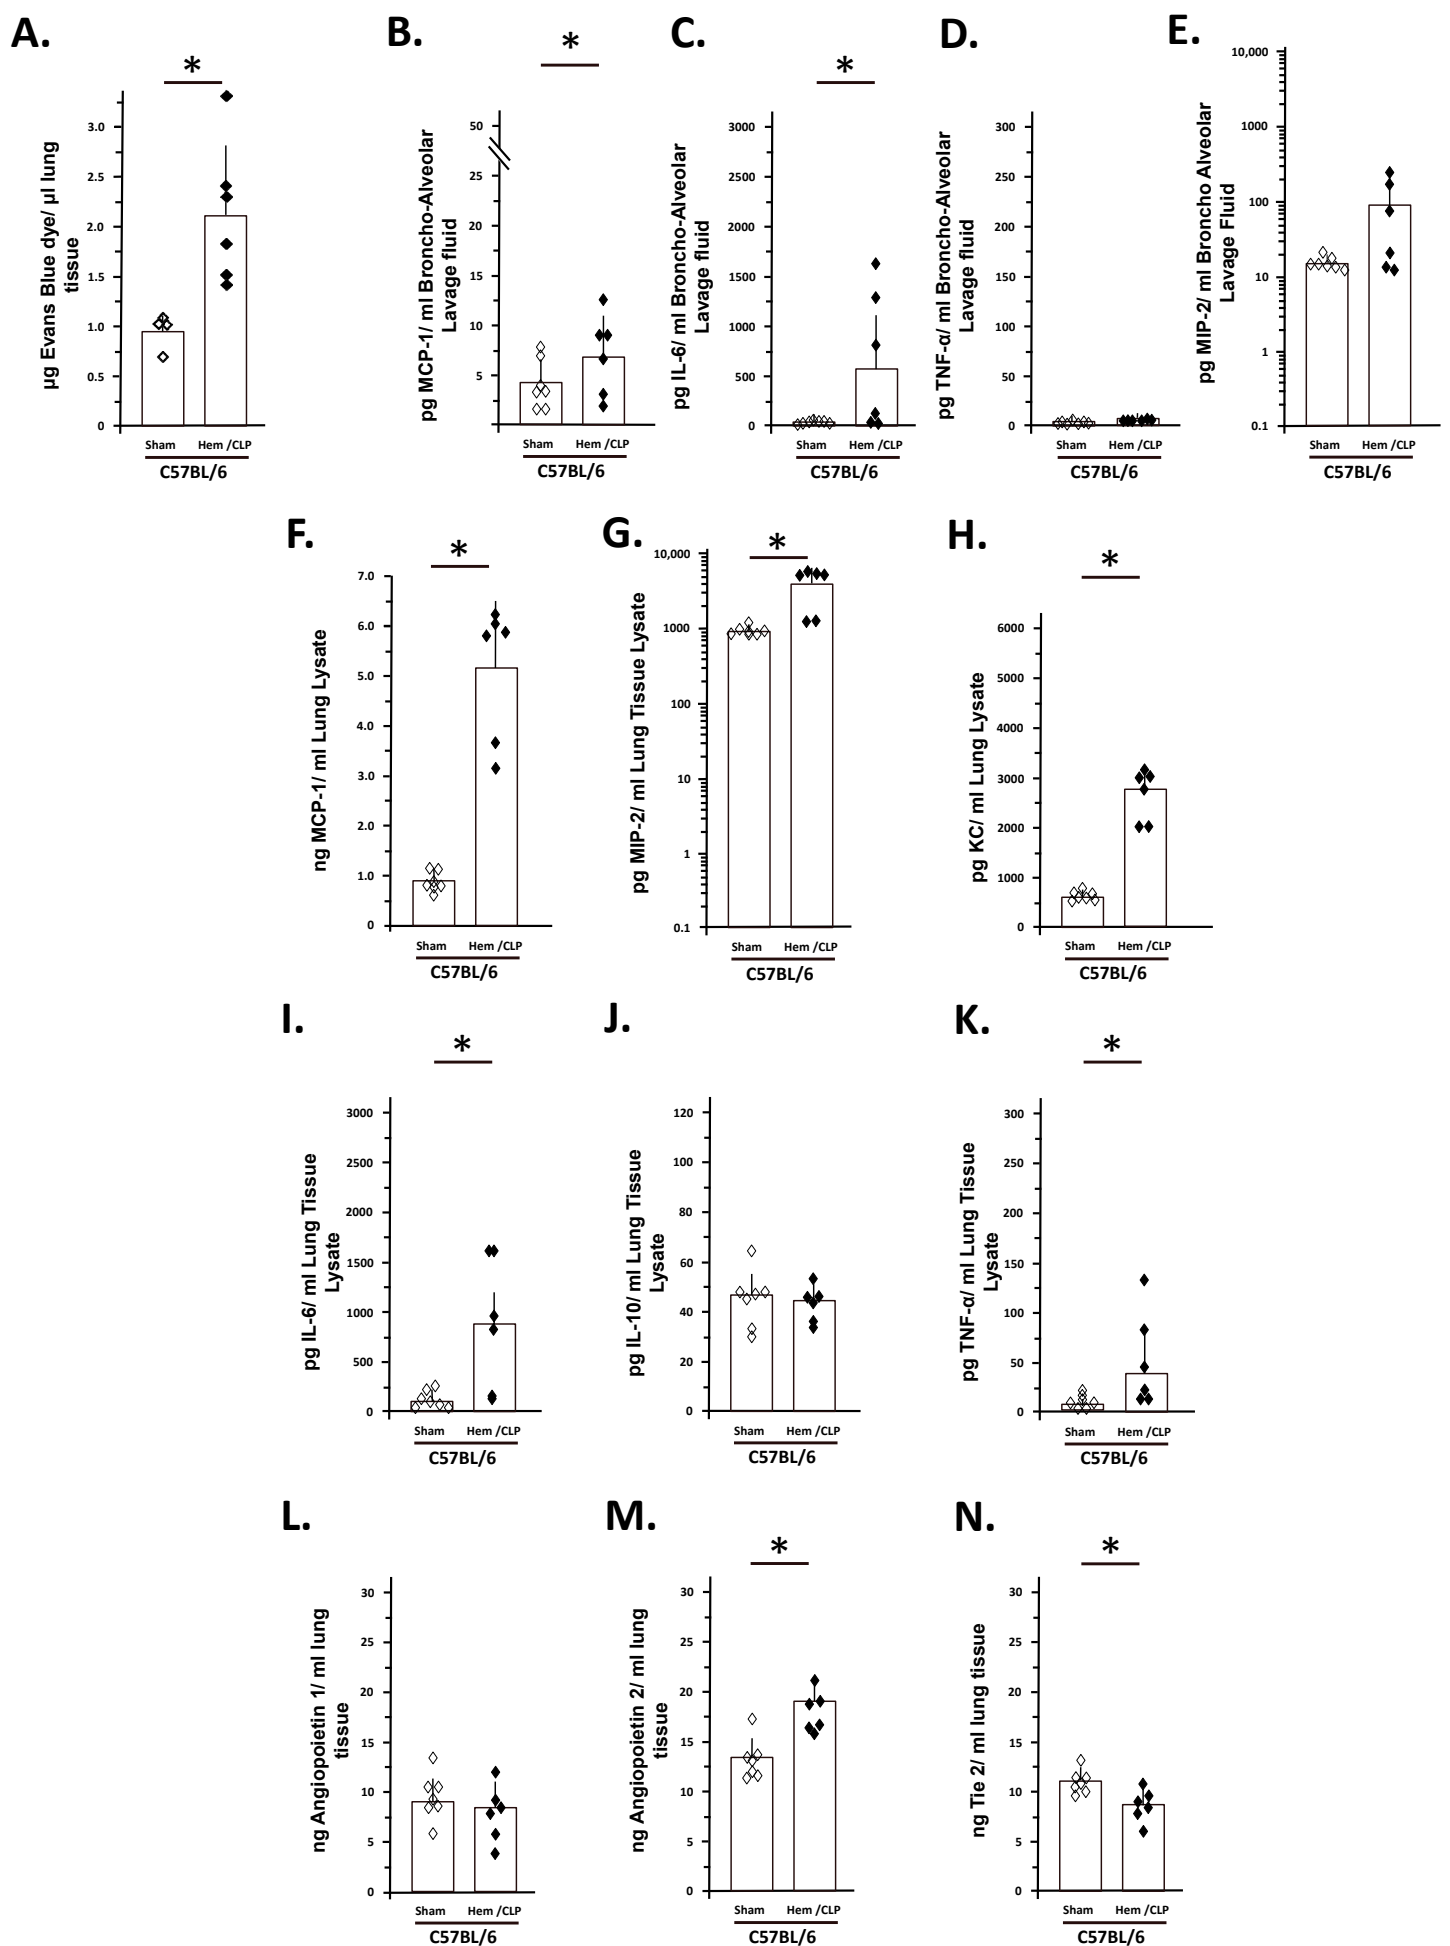

**Supplemental Figure 6.** Hem/CLP typical induced a marked changes in pulmonary vascular leak, BALF chemokines/cytokines, lung tissue chemokines/cytokines and lung tissues levels of Angiopoietin 1, 2 and Tie-2. The assessment of lung capillary leakage was done by extravasation of Evans blue (EB) dye method and the chemokine/cytokine or the Angiopoietin 1, 2 and Tie-2 levels were established by commercial ELISA. The n/treatment group are shown as symbols super-imposed on histogram depicting the group mean  $\pm$  the standard deviation; The presence of a significant difference between groups was established at \*  $p < 0.05$  with a Mann-Whitney-U test.
