# Supplementary material for: Differential Effects of Endothelial Cell- as opposed to Neutrophil-Lineage Restricted PD-L1 Gene Expression on Experimental Murine Shock/ Sepsis-Induced Lung Injury
Source: Research Square preprint supplement (doi:10.21203/rs.3.rs-7687015/v1), 2025-10-07

**Supplemental Figure 4.** The sequential model of Hem followed by CLP to induce indirect-ALI/ARDS like insult and temporal overview of experimental readouts assessed post Hem/CLP.

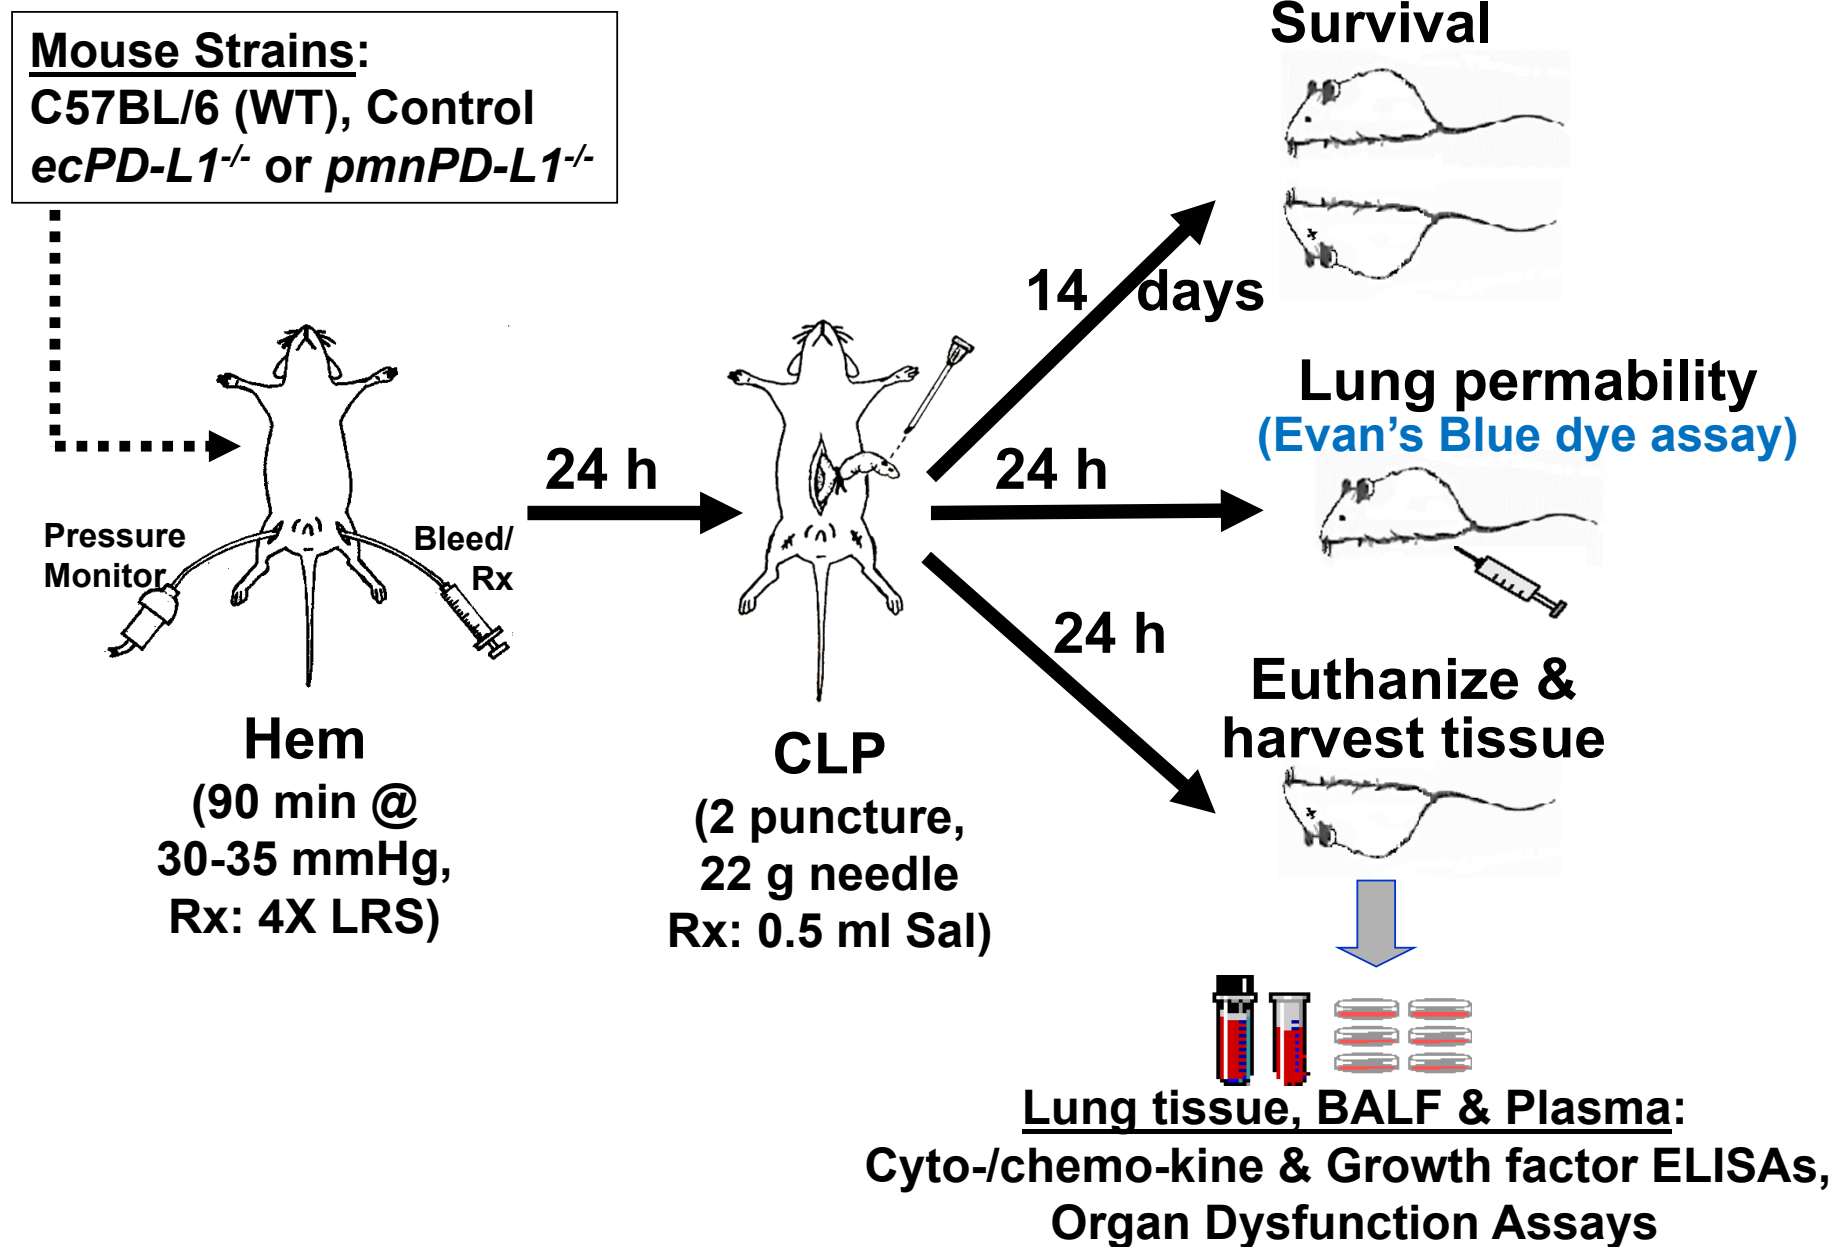

Supplement: Supplementary file 3 [file 84e6137c5aea6234e85ef6c1.pdf]
