# Supplementary material for: Differential Effects of Endothelial Cell- as opposed to Neutrophil-Lineage Restricted PD-L1 Gene Expression on Experimental Murine Shock/ Sepsis-Induced Lung Injury
Source: Research Square preprint supplement (doi:10.21203/rs.3.rs-7687015/v1), 2025-10-07
Supplement: Supplementary file 4 [file d1f999bafb9c5b00cc0ee8fe.pdf]

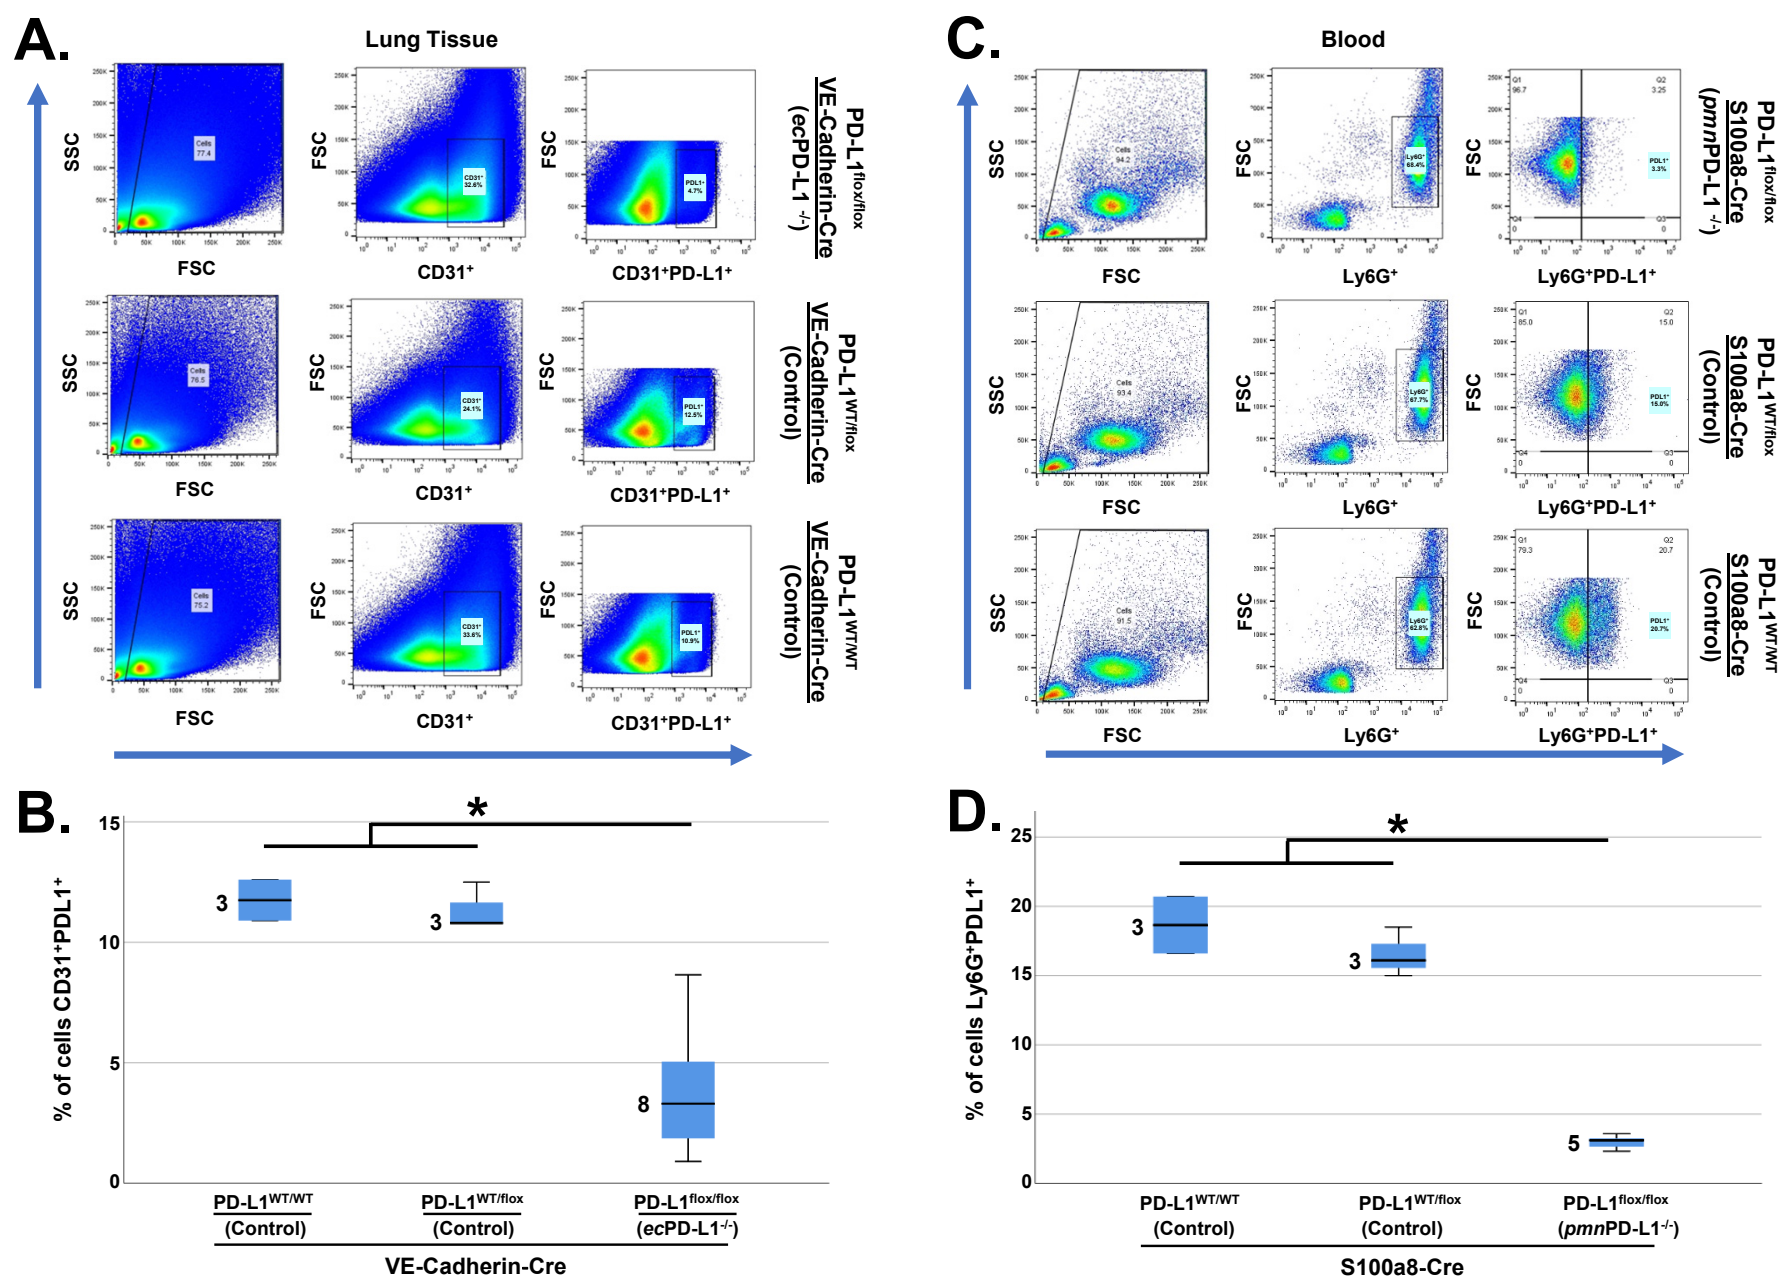

**Supplemental Figure 3. Documentation of endothelial cell (*ecPD-L1*<sup>-/-</sup>) (A., C.) or neutrophil (*pmnPD-L1*<sup>-/-</sup>) (B., D.) restricted constitutive PD-L1 gene deficient mice.** Gating strategy and typical flow cytogram/dot plot of select cell-lineage restricted PD-L1 expression (either CD31 & PD-L1 [A.] or Ly6G & PD-L1 [B.]) for 3 primary breeding outcomes from respective Cre-Lox matings for PD-L1<sup>flox/flox</sup> animals with B6.FVB-Tg(Cdh5-cre)7Mlia/J (A.) or PD-L1<sup>flox/flox</sup> animals with B6.Cg-Tg(S100a8-cre,-EGFP)11lw/J (B.) Summary data for the change in percentage PD-L1<sup>+</sup> endothelial cells (CD31<sup>+</sup>) (C.) and percentage PD-L1<sup>+</sup> neutrophils (Ly6G<sup>+</sup>). The presence of a significant difference between groups was established at \* p<0.05 with a Mann-Whitney-U test.
