# Supplementary material for: Differential Effects of Endothelial Cell- as opposed to Neutrophil-Lineage Restricted PD-L1 Gene Expression on Experimental Murine Shock/ Sepsis-Induced Lung Injury
Source: Research Square preprint supplement (doi:10.21203/rs.3.rs-7687015/v1), 2025-10-07
Supplement: Supplementary file 5 [file e0c40cd8f9599e8c5427e4b7.pdf]

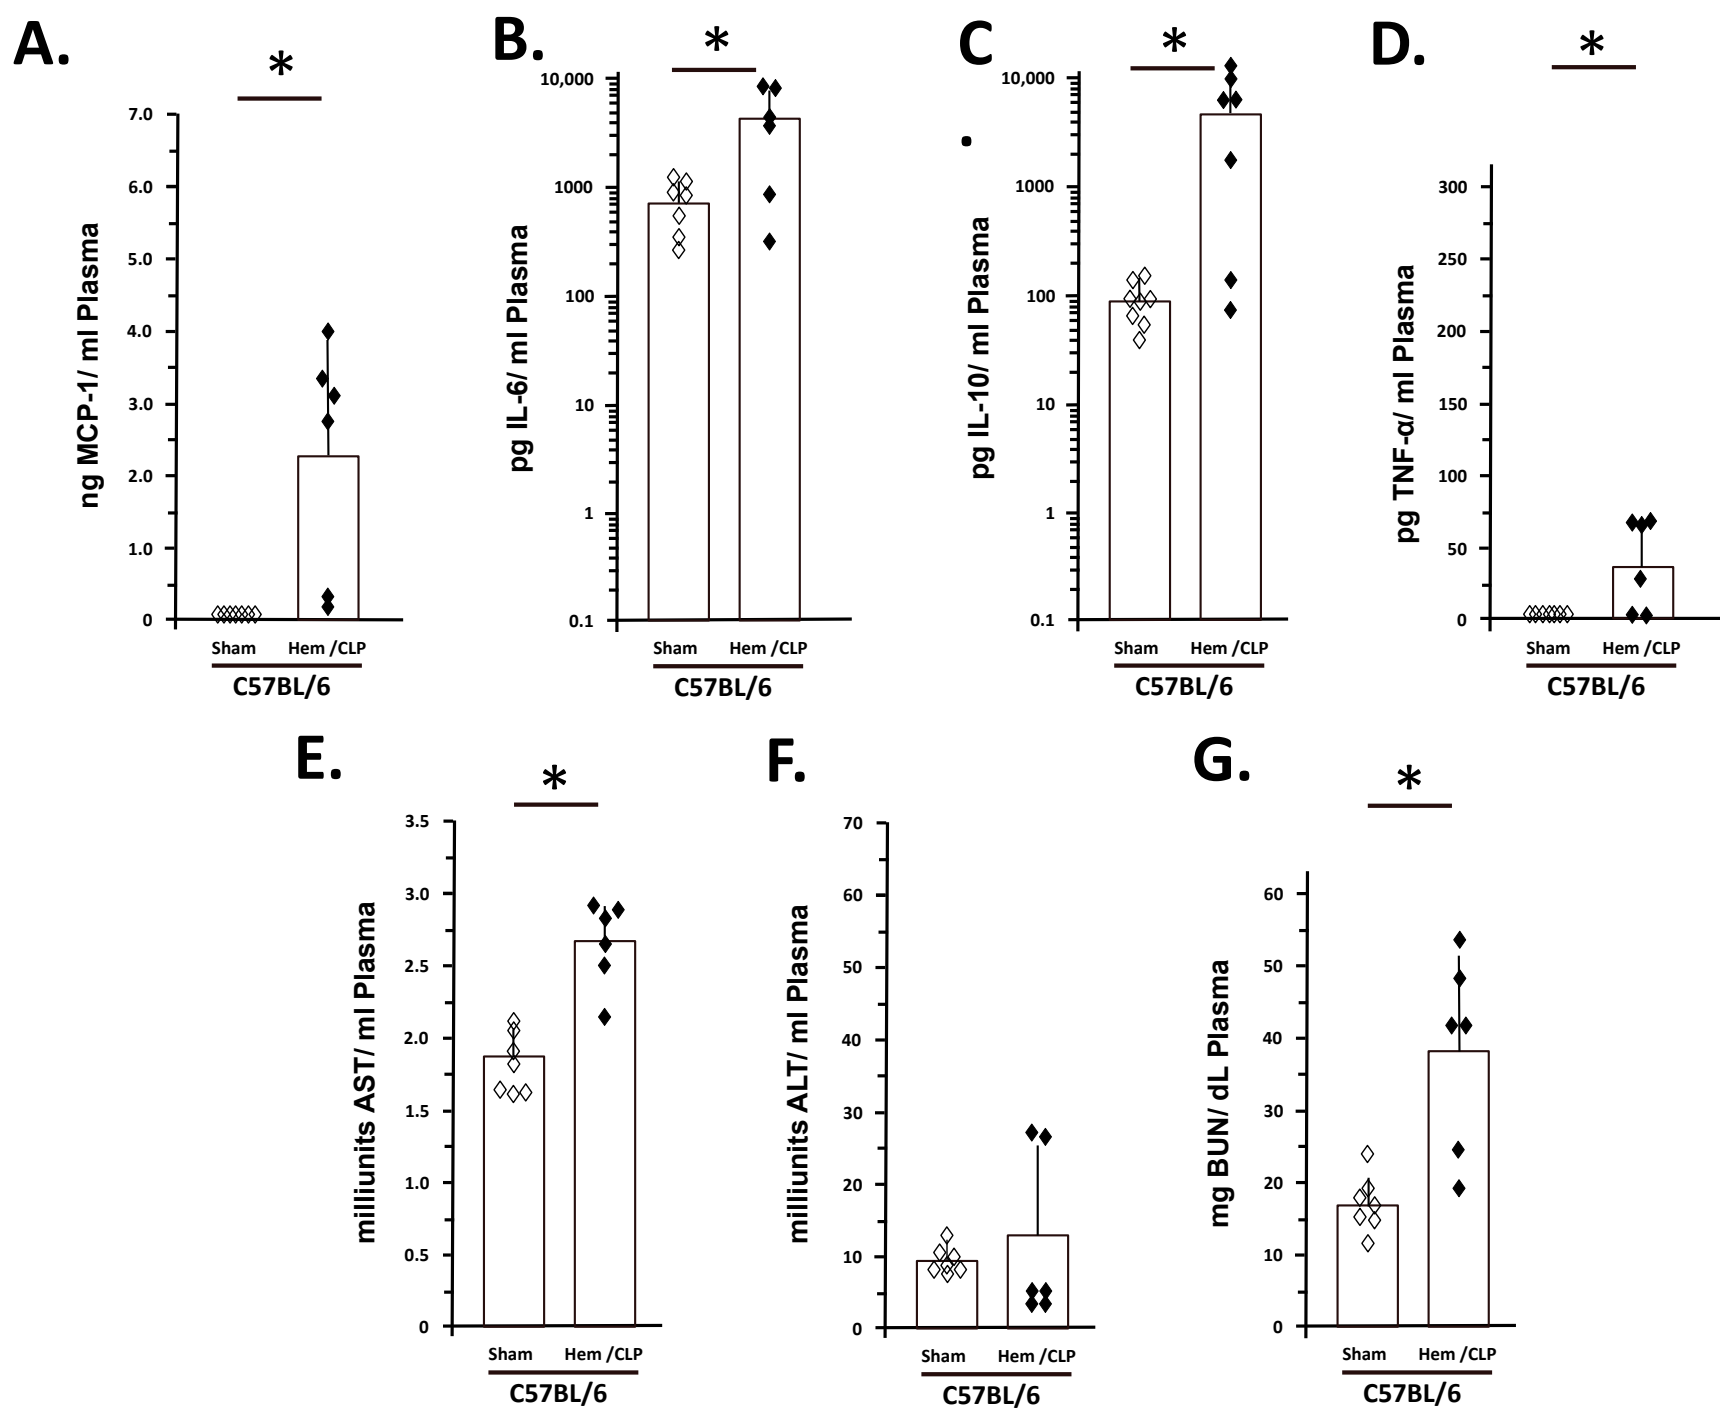

**Supplemental Figure 7. Hem/CLP typical induced marked changes in plasma chemokines/ cytokines and indices of organ injury, i.e., AST, ALT and BUN.** The assessment of systemic plasma chemokine/cytokine levels by ELISA or the AST, ALT and BUN concentration was determined by commercial assay. The n/treatment group are shown as symbols super-imposed on histogram depicting the group mean  $\pm$  the standard deviation; the presence of a significant difference between groups was established at  $p < 0.05$  with a Mann-Whitney-U test.
